# Supplementary material
Source: publisher figshare collection journal article supplement (https://sage.figshare.com/ndownloader/files/20080109)
Supplement: Supplementary file 1 [file 20080109]

## Supplemental material

A detailed map of all parks and measurement points

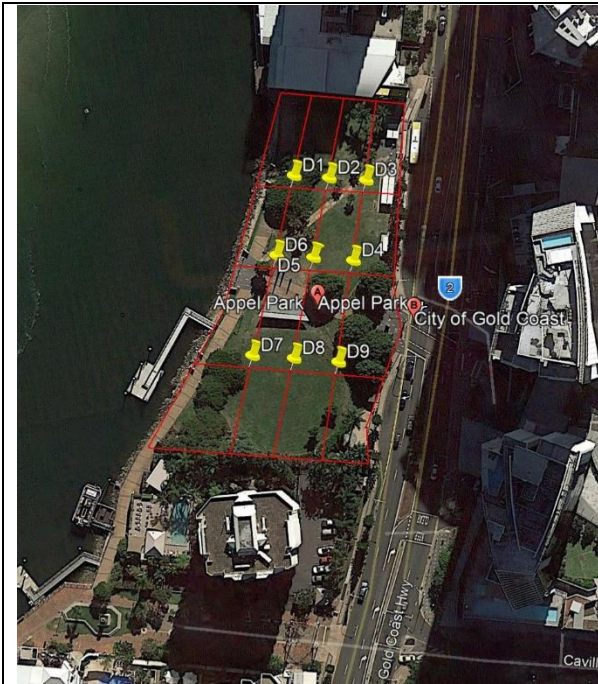

Apple Park

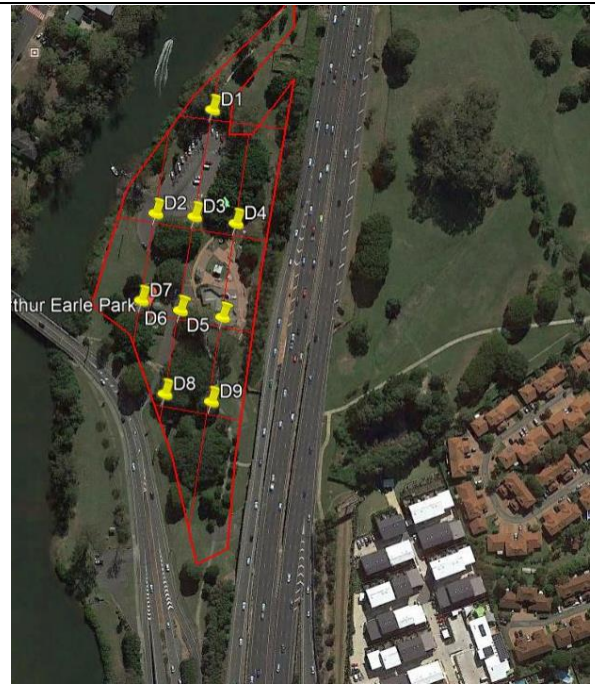

Arthur Park

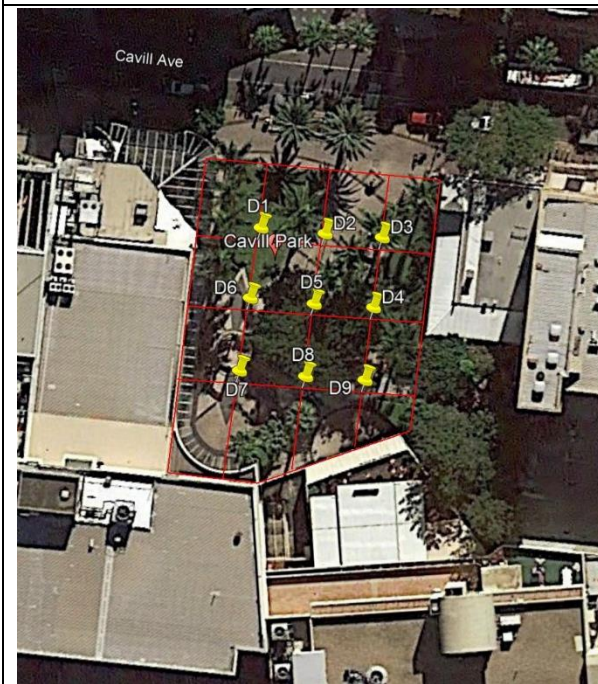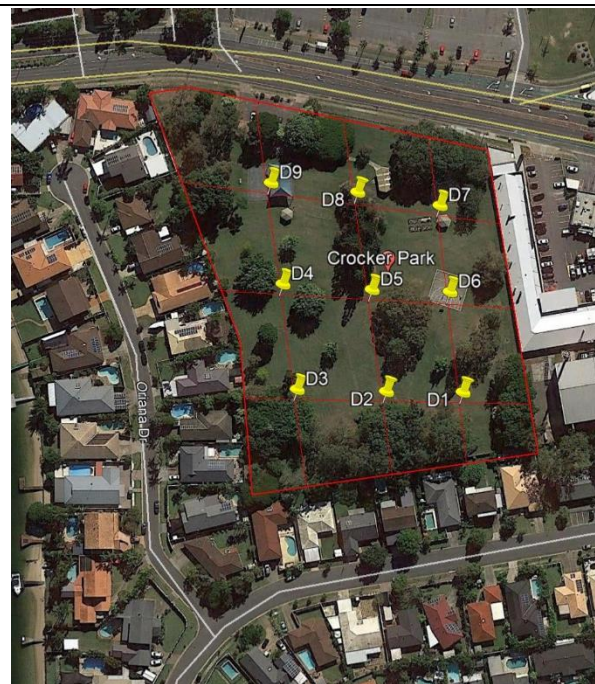



Cavil Park

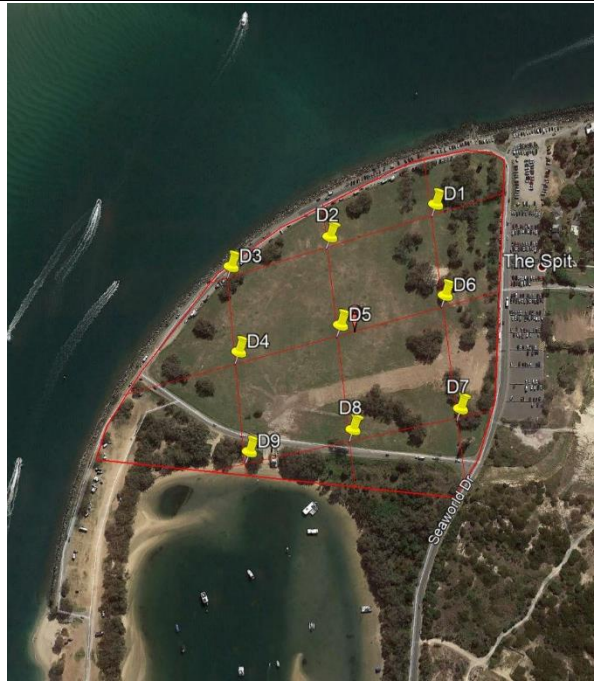

Crocker Park

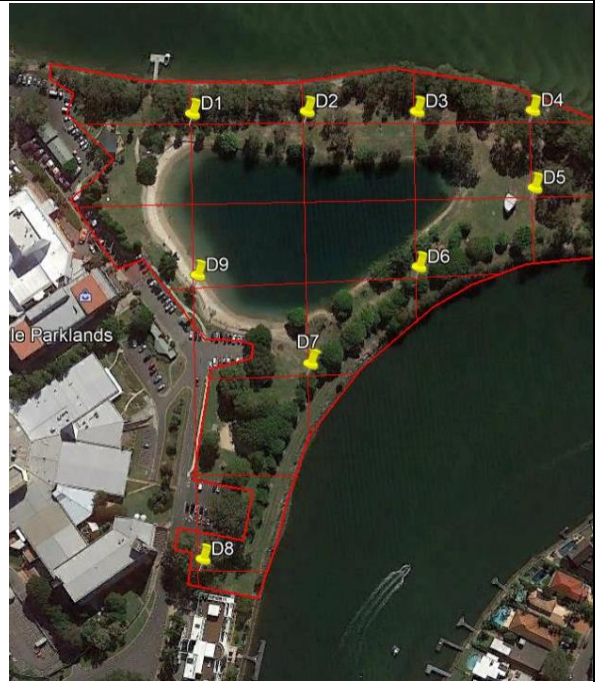

Doug Jennings Park

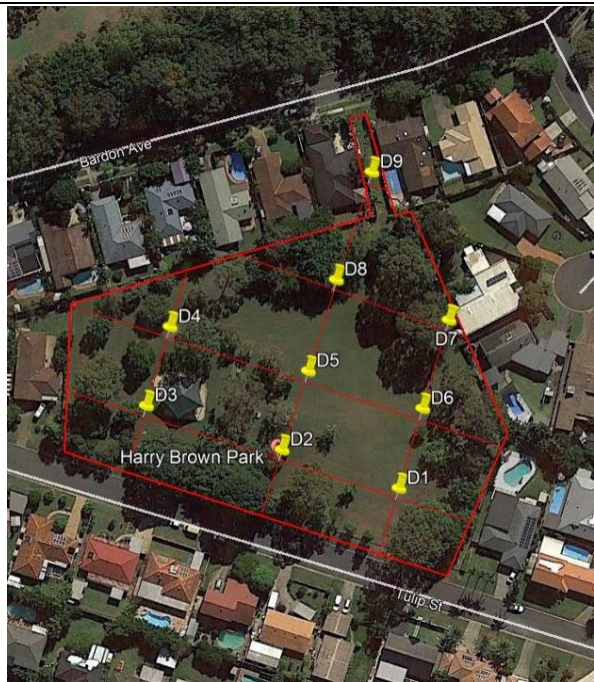

Evandale Park

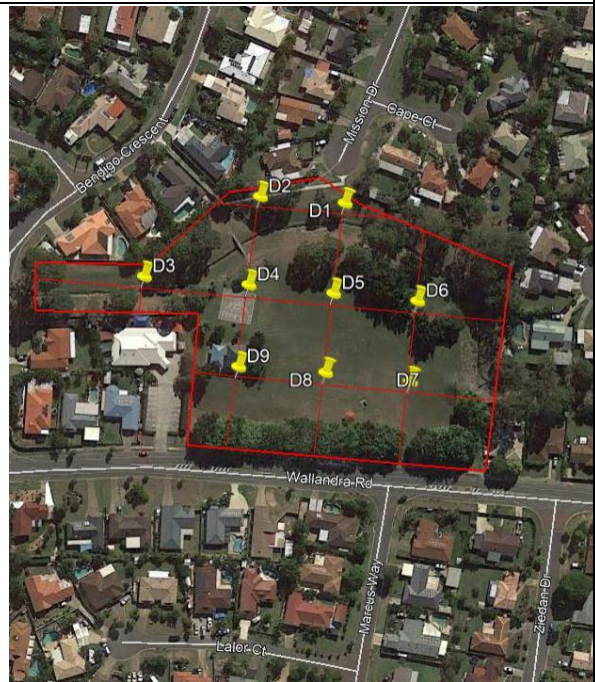

Harry Brown Park

Ingles Park



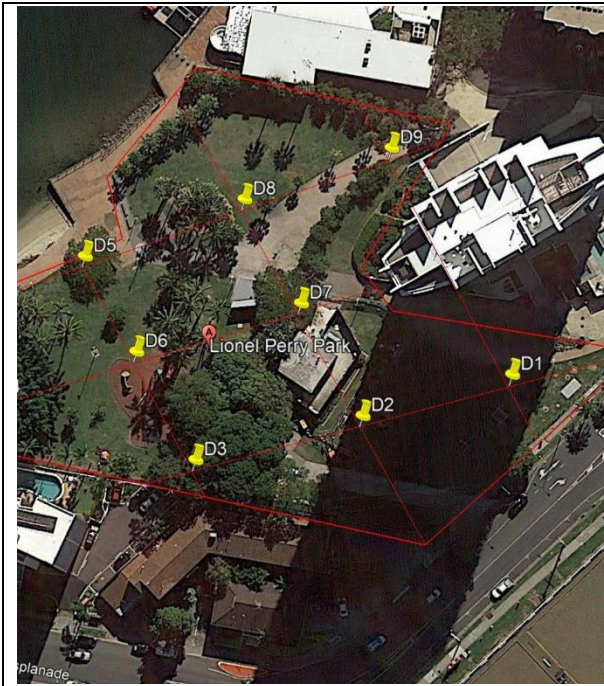

Lionel Perry Park

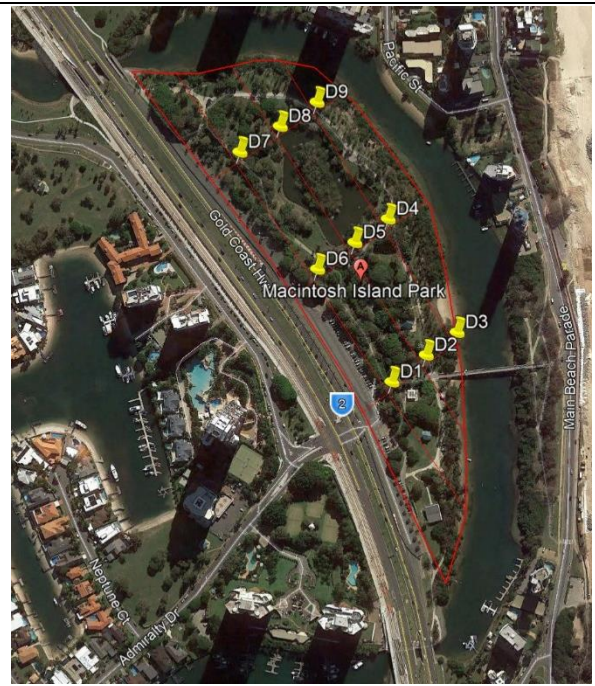

Macintosh

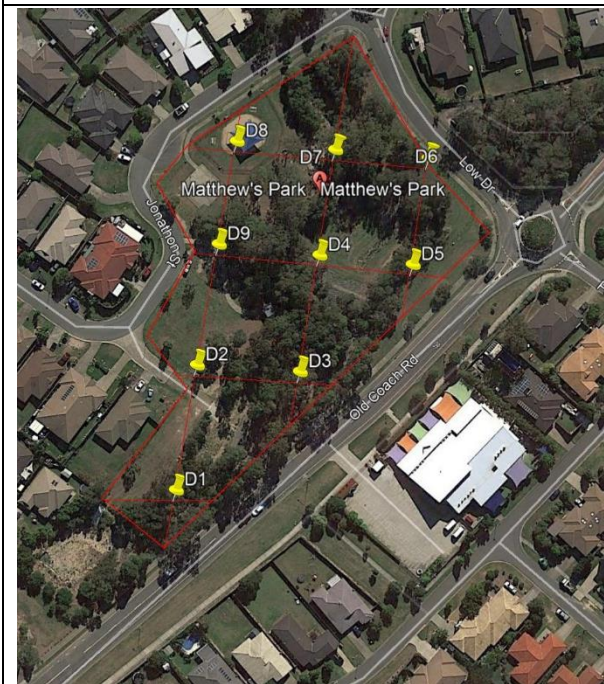

Matthew's Park

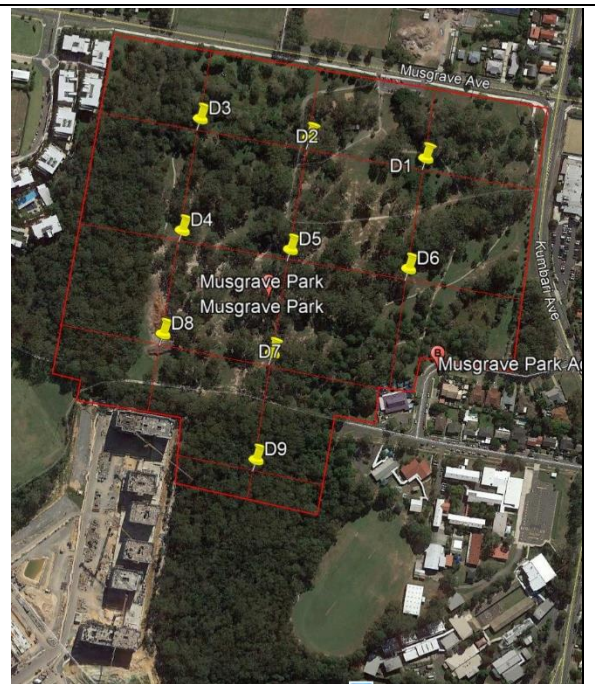

Musgrave Park



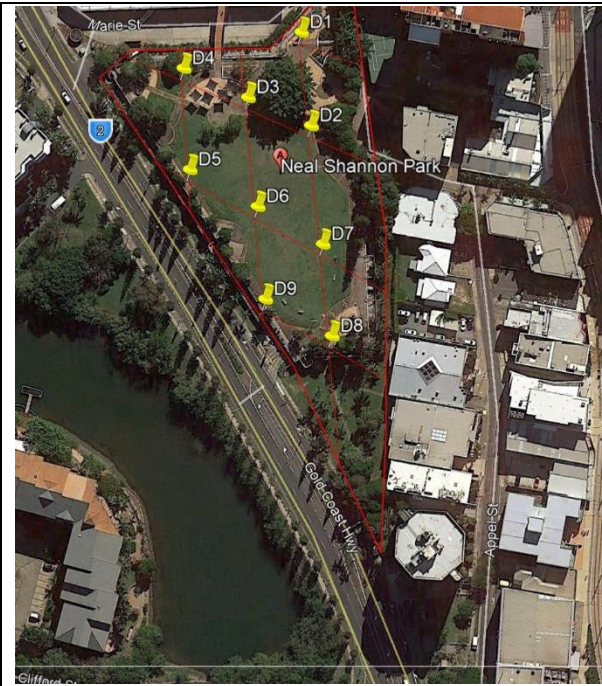

Neal Shannon Park

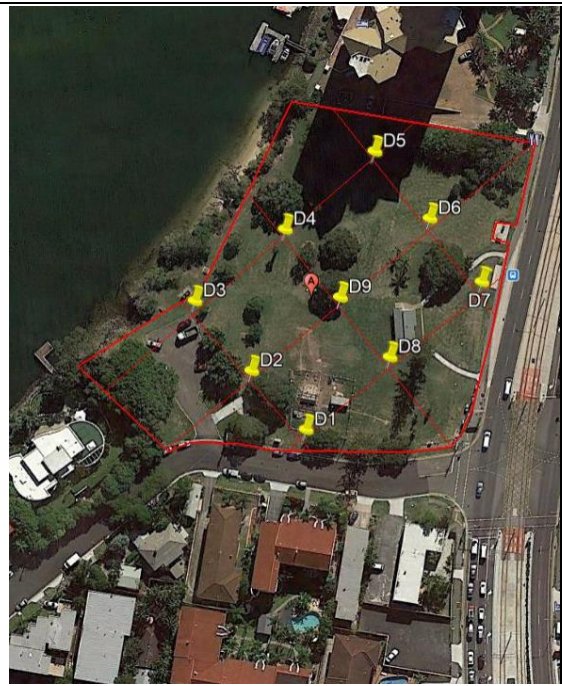

Neddy Harper Park

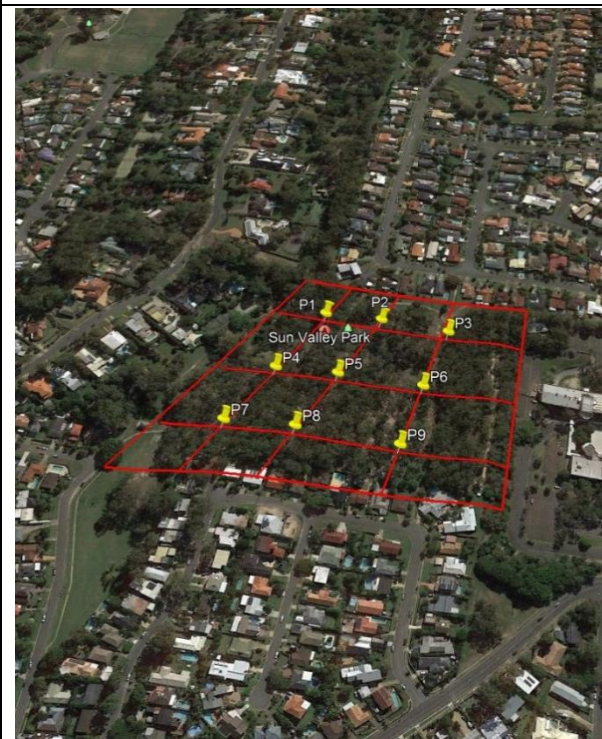

Sun Valley Park

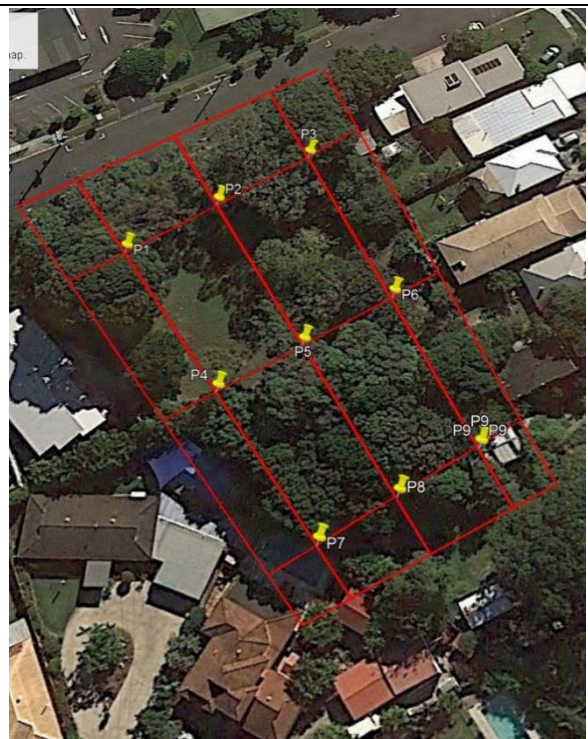

Tenth Avenue Park



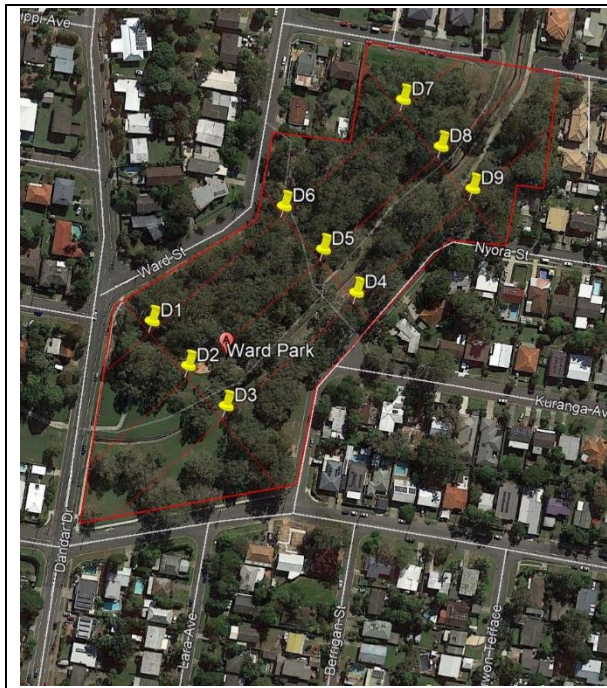

Ward Park

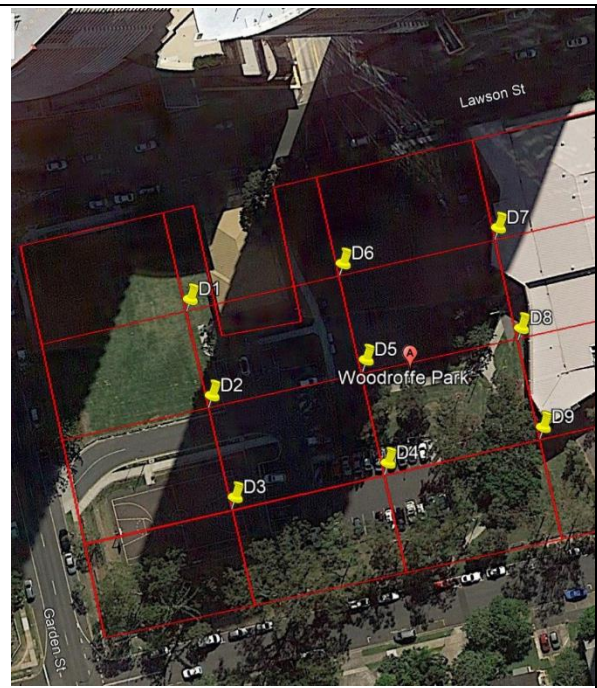

Woodroffe Park
